# Supplementary material
Source: publisher figshare collection journal article supplement (https://springernature.figshare.com/ndownloader/files/13512386)

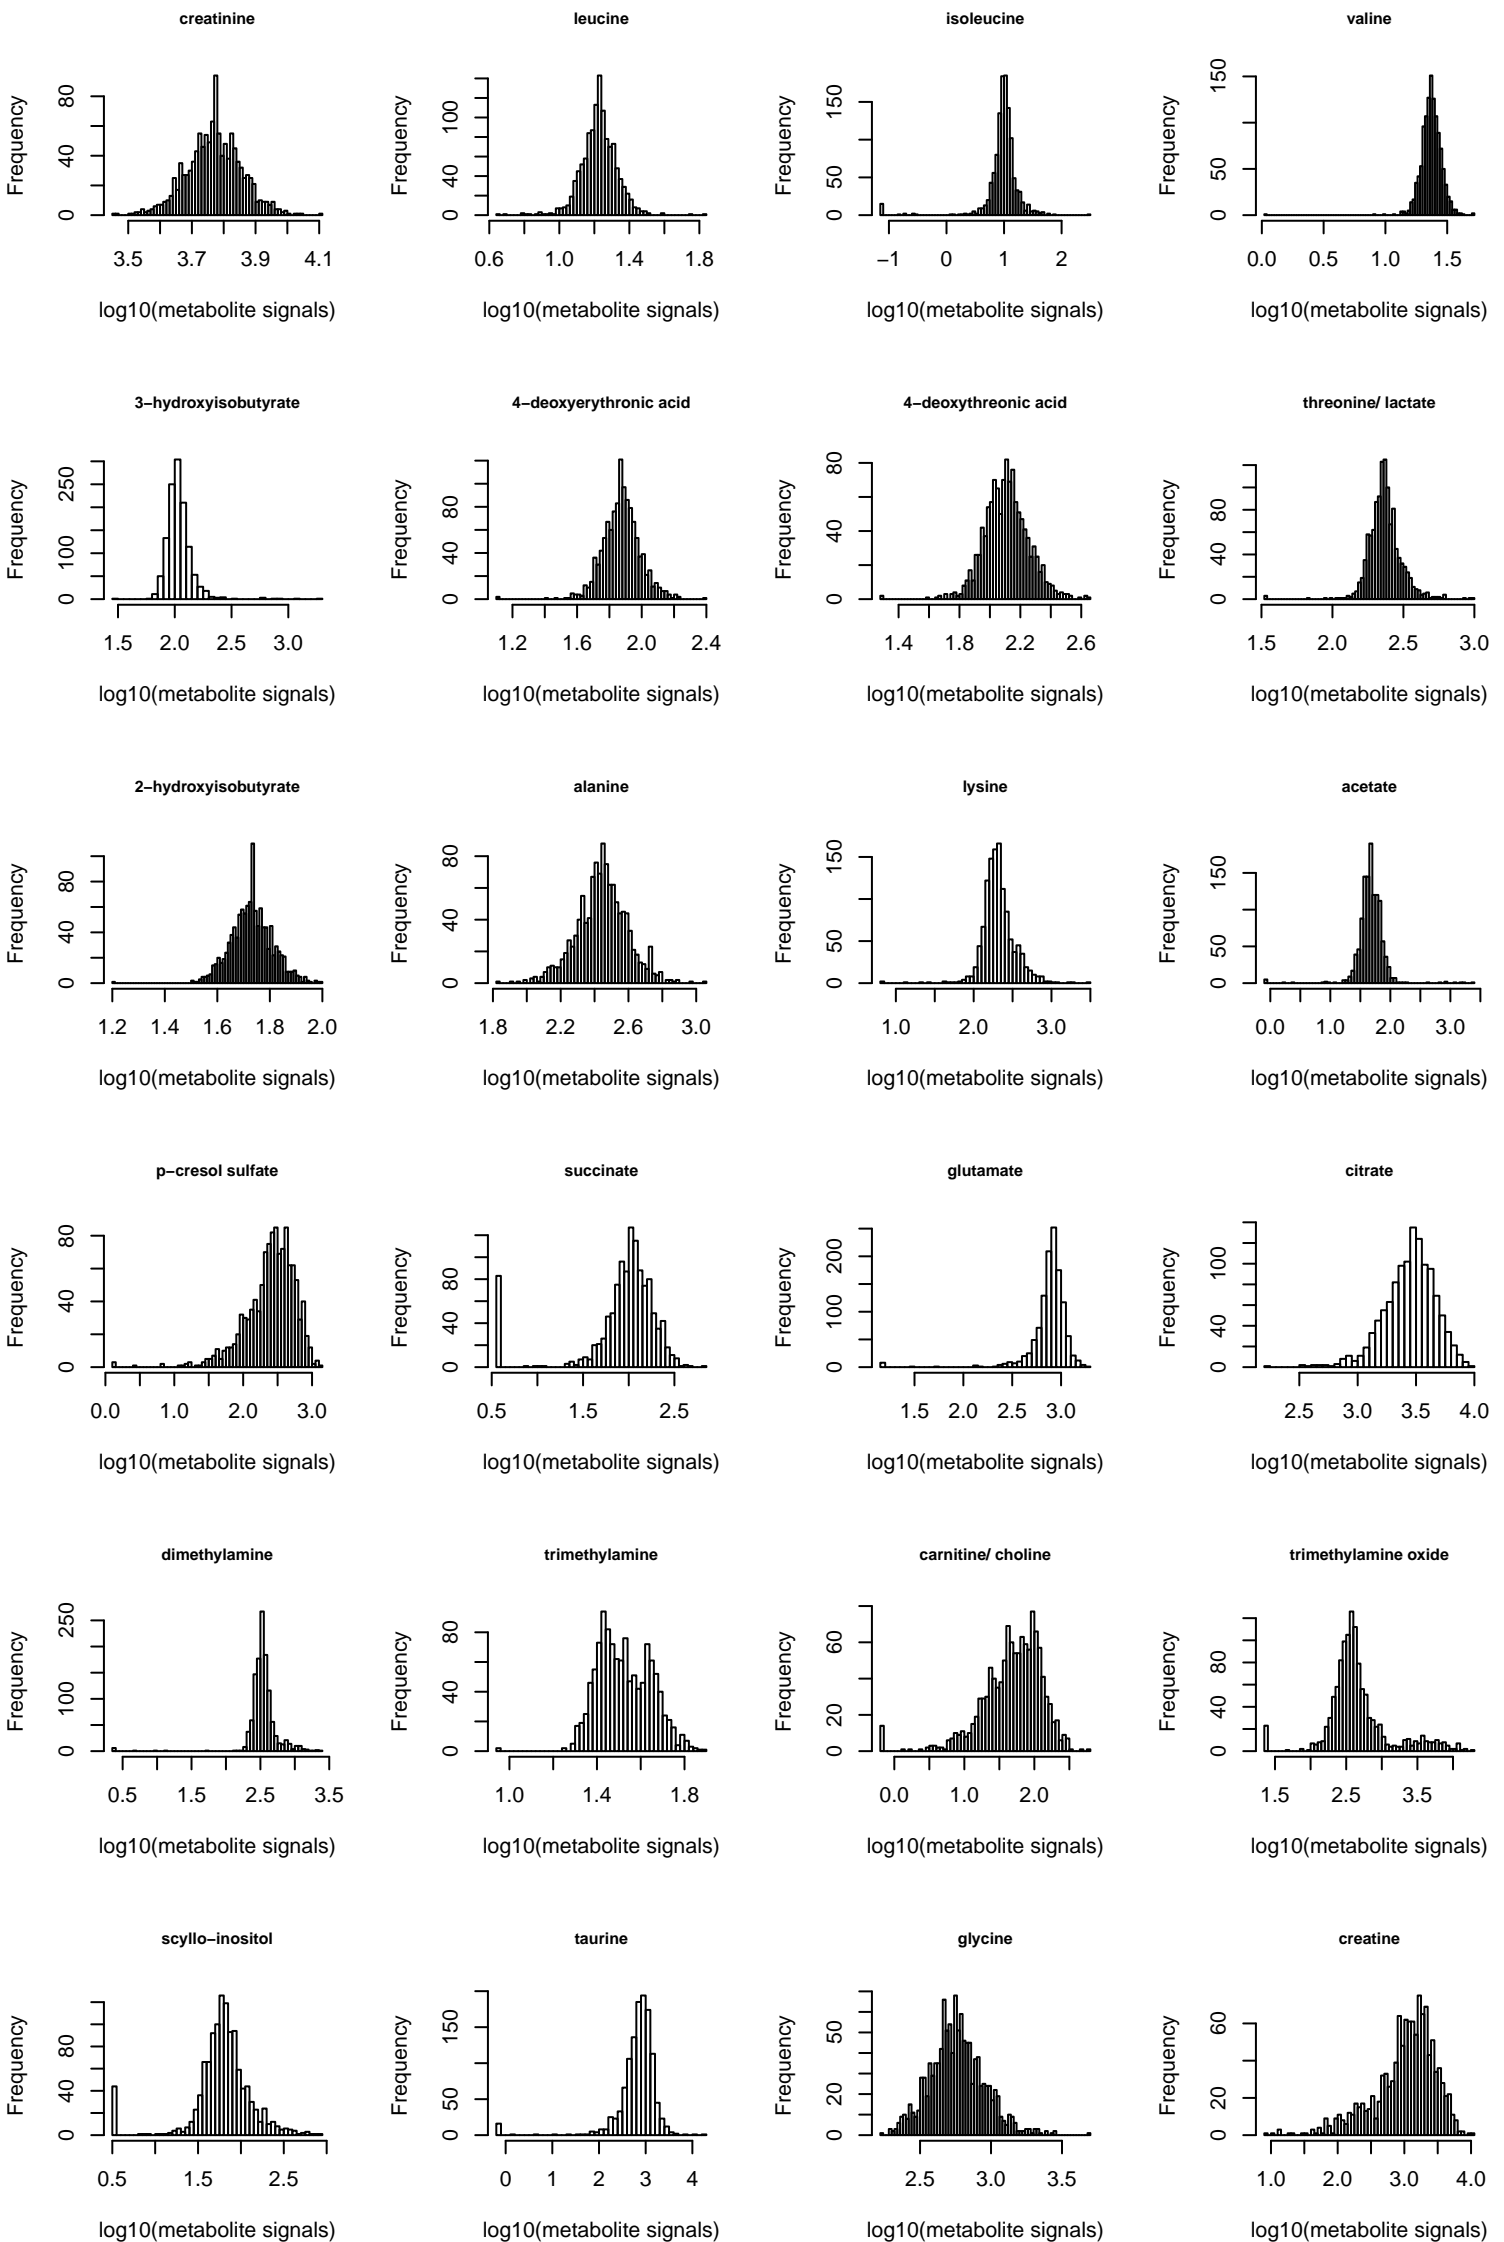

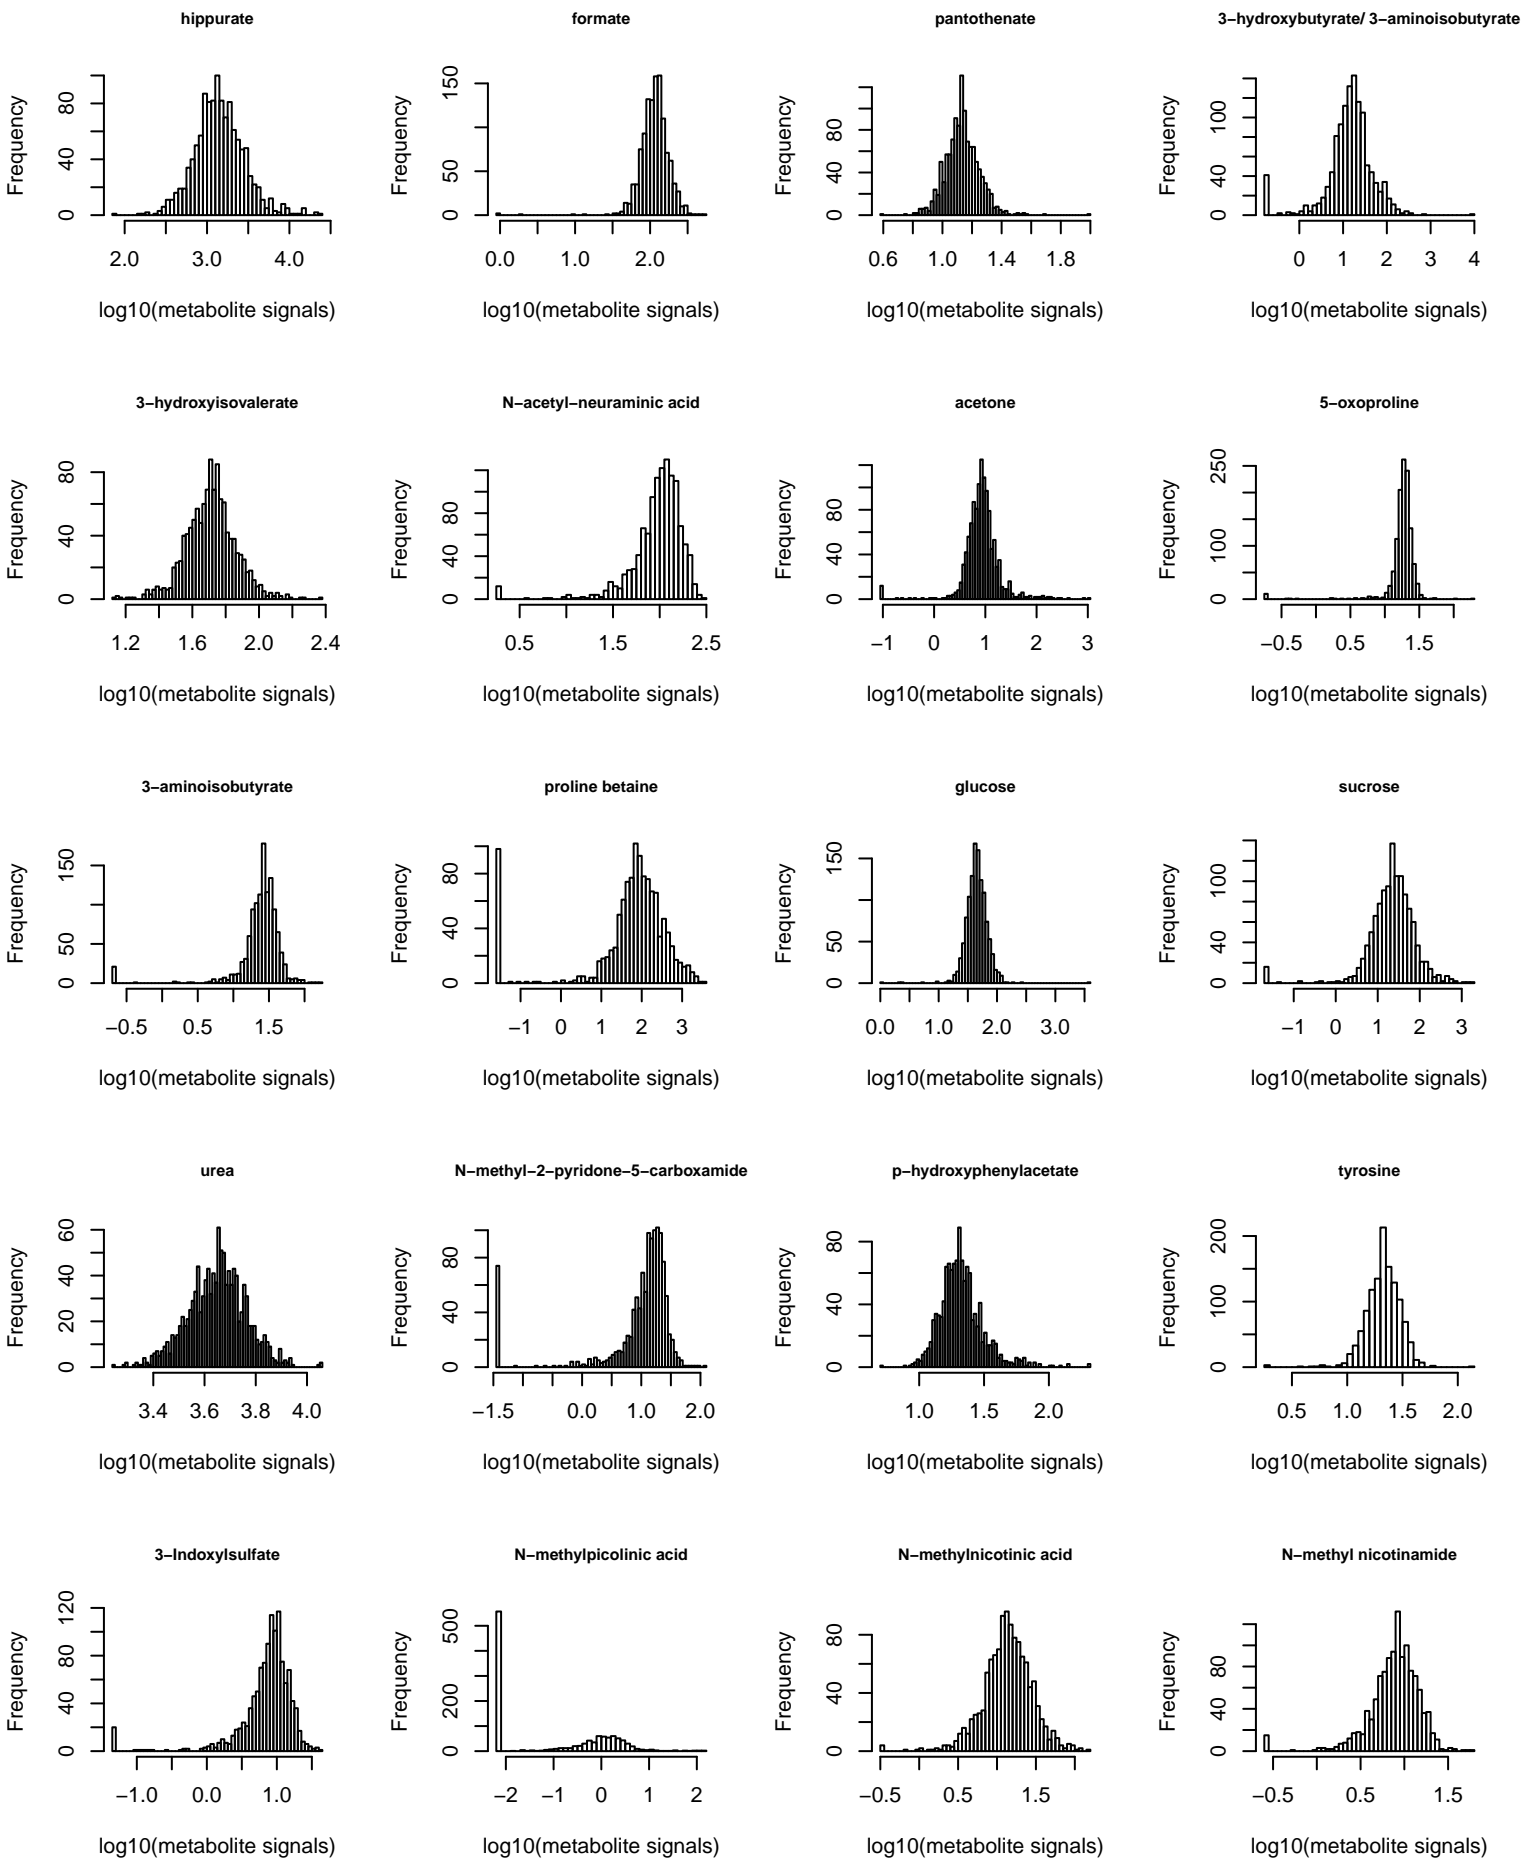

Supplement: Supplementary file [file 13512386]
